# Supplementary material for: Hypoxia in mangroves: occurrence and impact on valuable tropical fish habitat
Source: Copernicus journal article supplement (doi:10.5194/bg-16-3959-2019), 2019-10-15
Supplement: Supplementary file 1 [file bg-16-3959-2019-supplement.pdf]

Supplement of Biogeosciences, 16, 3959–3976, 2019  
<https://doi.org/10.5194/bg-16-3959-2019-supplement>  
© Author(s) 2019. This work is distributed under  
the Creative Commons Attribution 4.0 License.

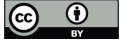

*Supplement of*

## **Hypoxia in mangroves: occurrence and impact on valuable tropical fish habitat**

**Alexia Dubuc et al.**

*Correspondence to:* Alexia Dubuc ([alexia.dubuc1@my.jcu.edu.au](mailto:alexia.dubuc1@my.jcu.edu.au))

The copyright of individual parts of the supplement might differ from the CC BY 4.0 License.
